# Supplementary material for: Monitoring aerosols over Europe: an assessment of the potential benefit of assimilating the VIS04 measurements from the future MTG/FCI geostationary imager
Source: Copernicus journal article supplement (doi:10.5194/amt-12-1251-2019), 2019-02-27
Supplement: Supplementary file 1 [file amt-12-1251-2019-supplement.pdf]

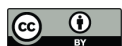

## *Supplement of*

# **Monitoring aerosols over Europe: an assessment of the potential benefit of assimilating the VIS04 measurements from the future MTG/FCI geostationary imager**

**Maxence Descheemaeker et al.**

*Correspondence to:* Matthieu Plu ([matthieu.plu@meteo.fr](mailto:matthieu.plu@meteo.fr))

The copyright of individual parts of the supplement might differ from the CC BY 4.0 License.

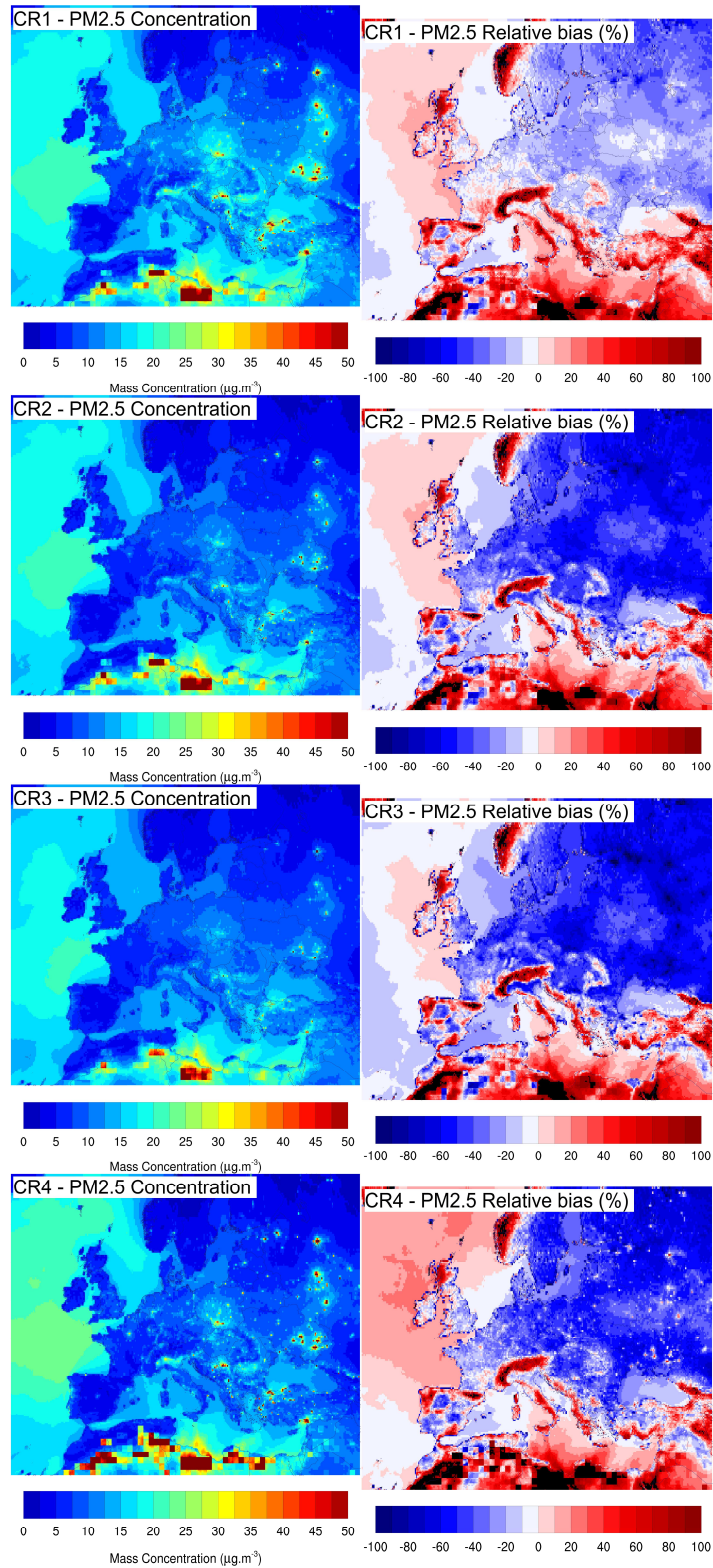

**Figure S1:** For each CR (CR1, CR2, CR3 and CR4), the figures represent a PM<sub>2.5</sub> comparison between the NR and the CRs from January to April 2014: the mean surface concentration of the CR and the normalized differences between CRs and the NR.

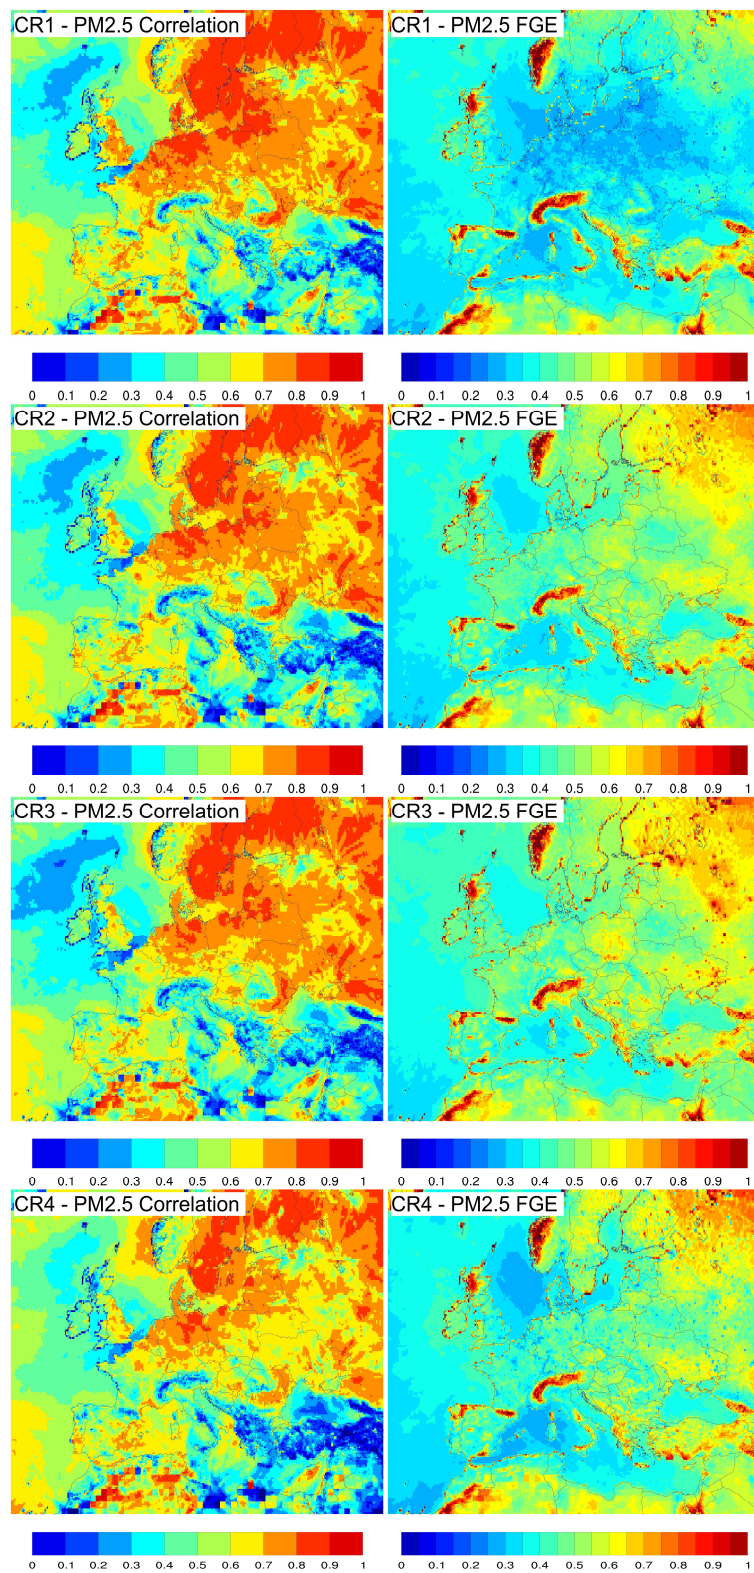

**Figure S2:** For each CR (CR1, CR2, CR3 and CR4), the figures represent a PM<sub>2.5</sub> comparison between the NR and the CRs from January to April 2014: the Pearson correlation and the fractional gross error.



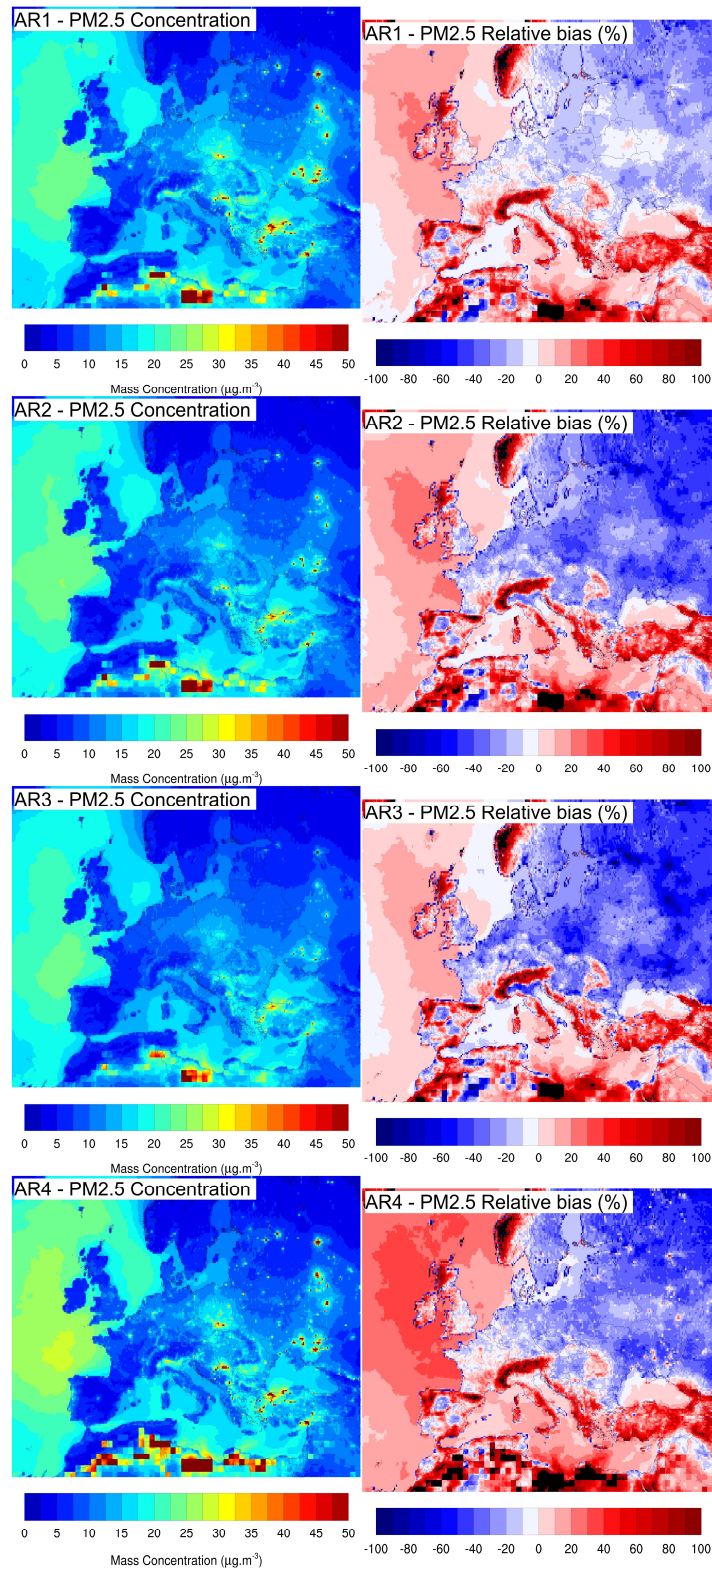

**Figure S3:** For each AR (AR1, AR2, AR3 and AR4), the figures represent a PM<sub>2.5</sub> comparison between the NR and the ARs from January to April 2014: the mean surface concentration of the AR and the normalized differences between ARs and the NR.



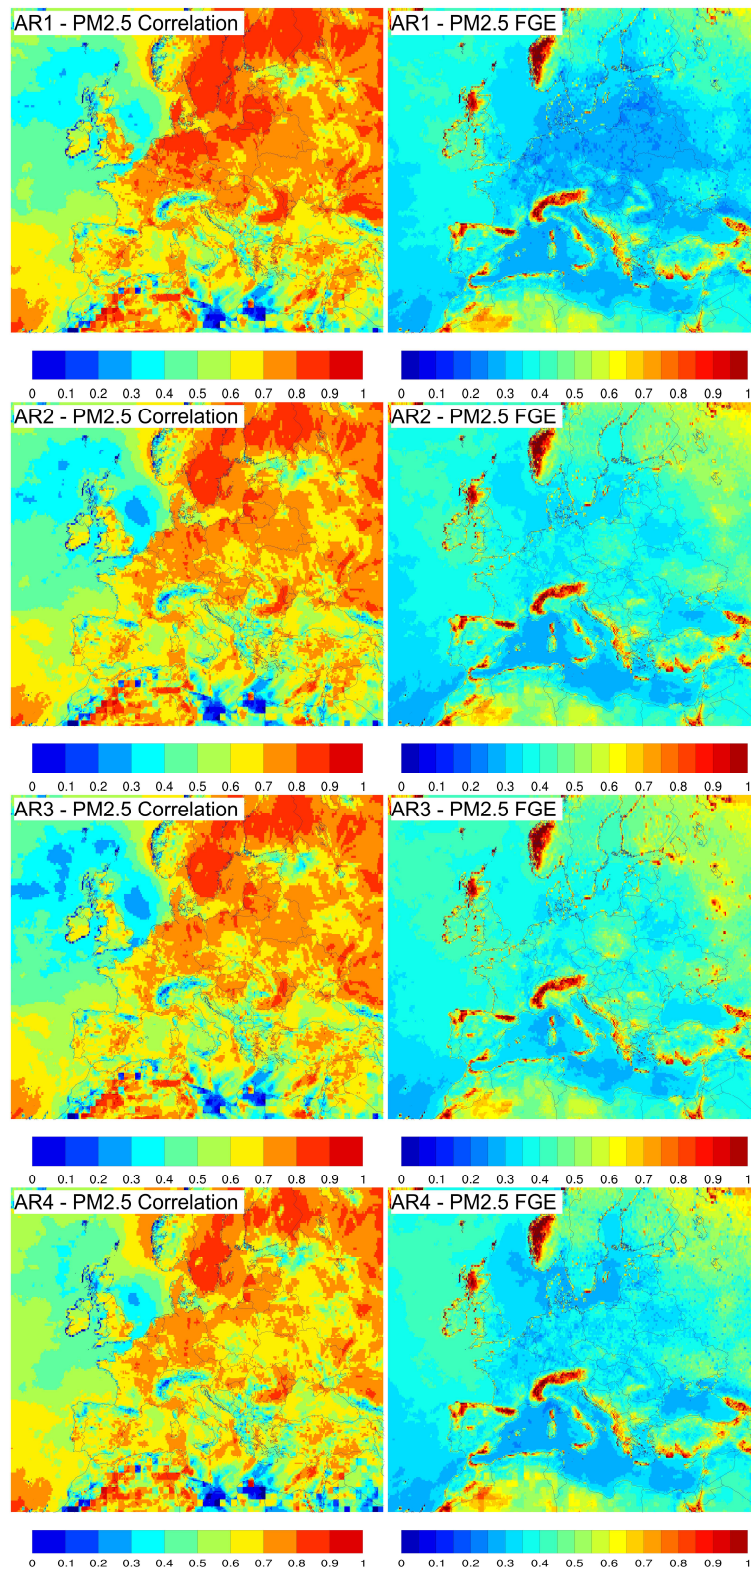

**Figure S4:** For each AR (AR1, AR2, AR3 and AR4), the figures represent a PM<sub>2.5</sub> comparison between the NR and the ARs from January to April 2014: the Pearson correlation and the fractional gross error.

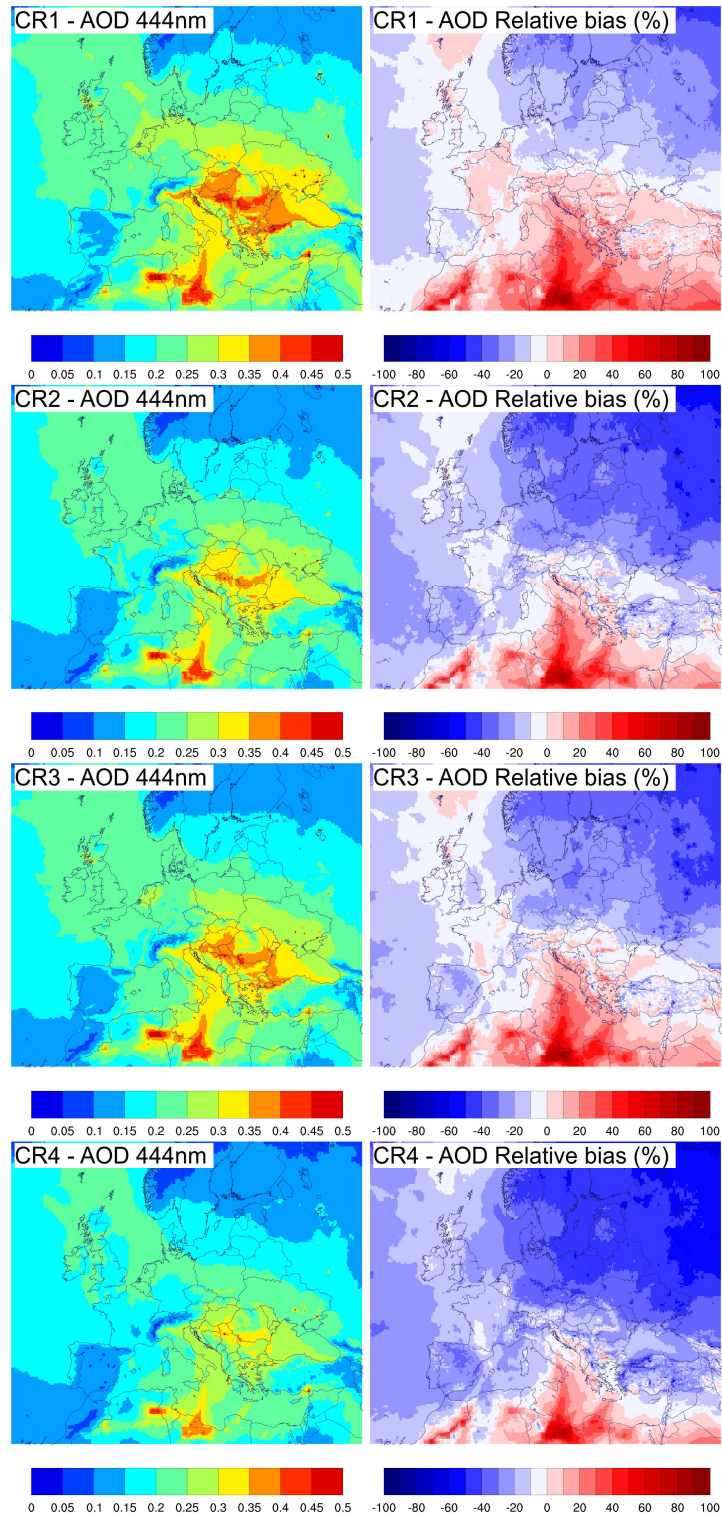

**Figure S5:** For each CR, the figures represent the mean AOD of the CR and the normalized differences between the NR and the CR for the period from January to April 2014.



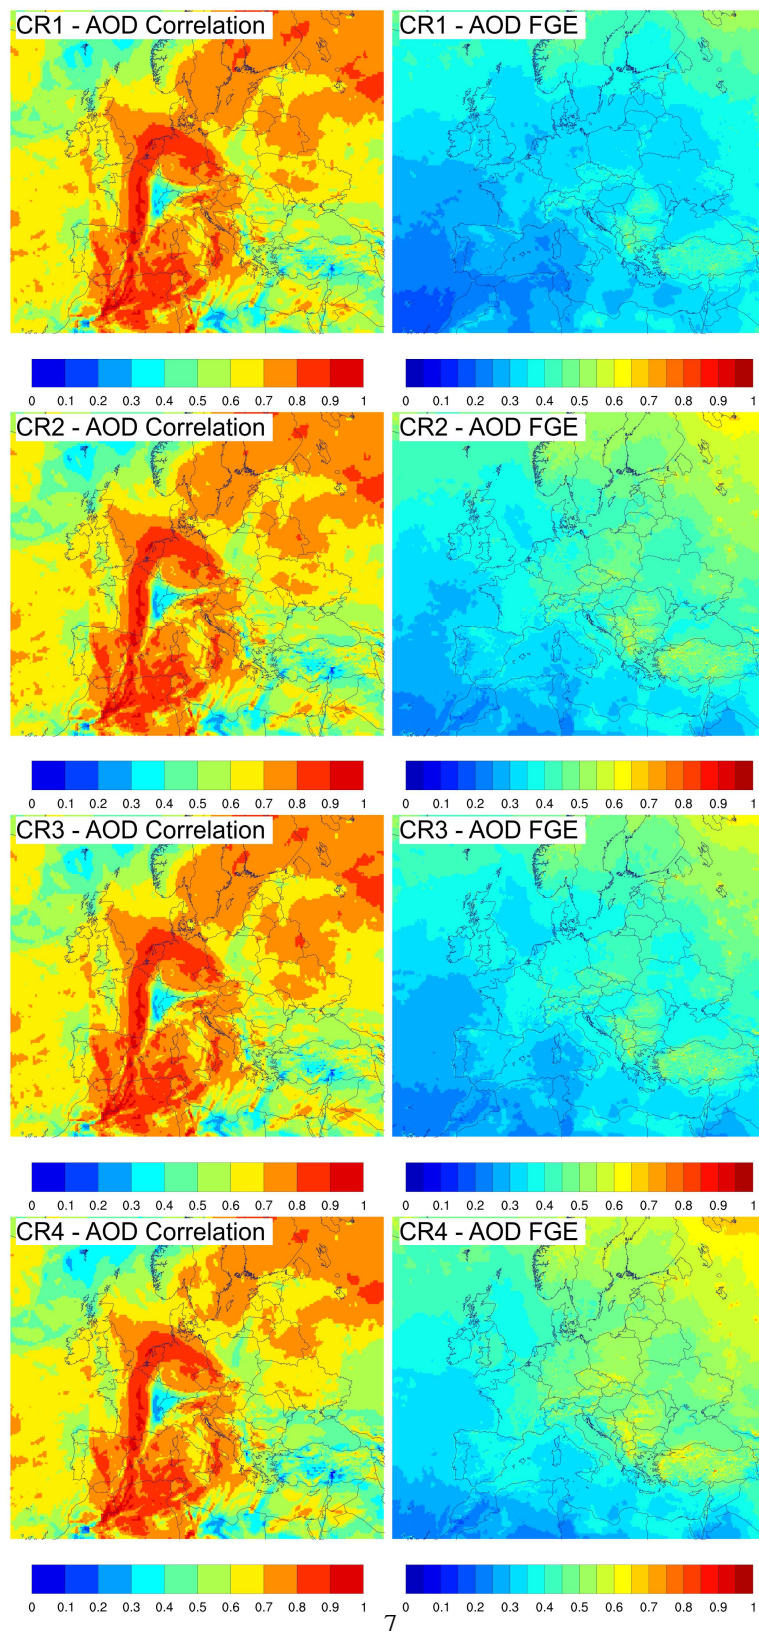

**Figure S6:** For each CR, the figures represent the Pearson correlation and the fractional gross error of AOD between the NR and the CR for the period from January to April 2014.



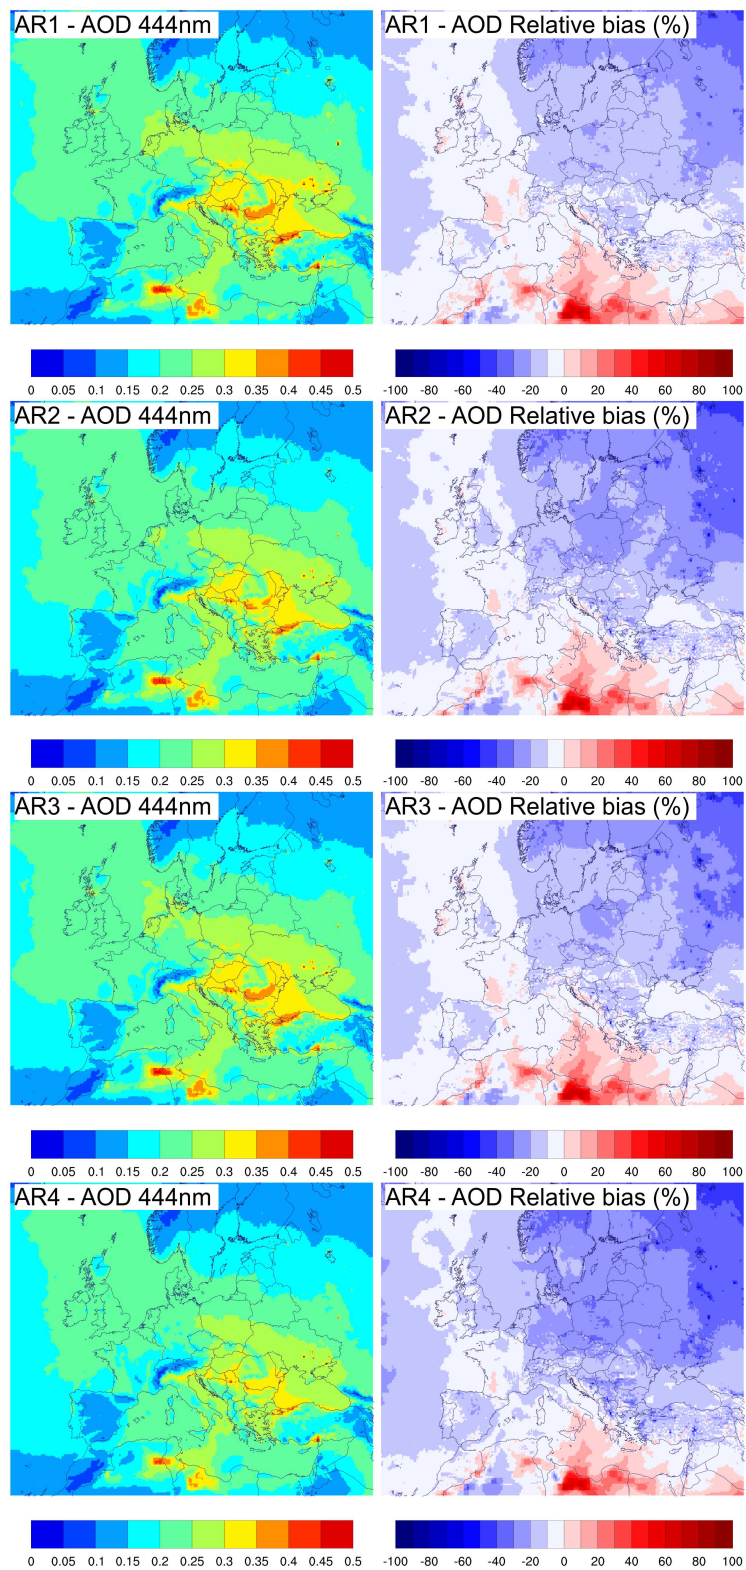

**Figure S7: For each AR, the figures represent the mean AOD of the AR and the normalized differences between the NR and the AR for the period from January to April 2014.**

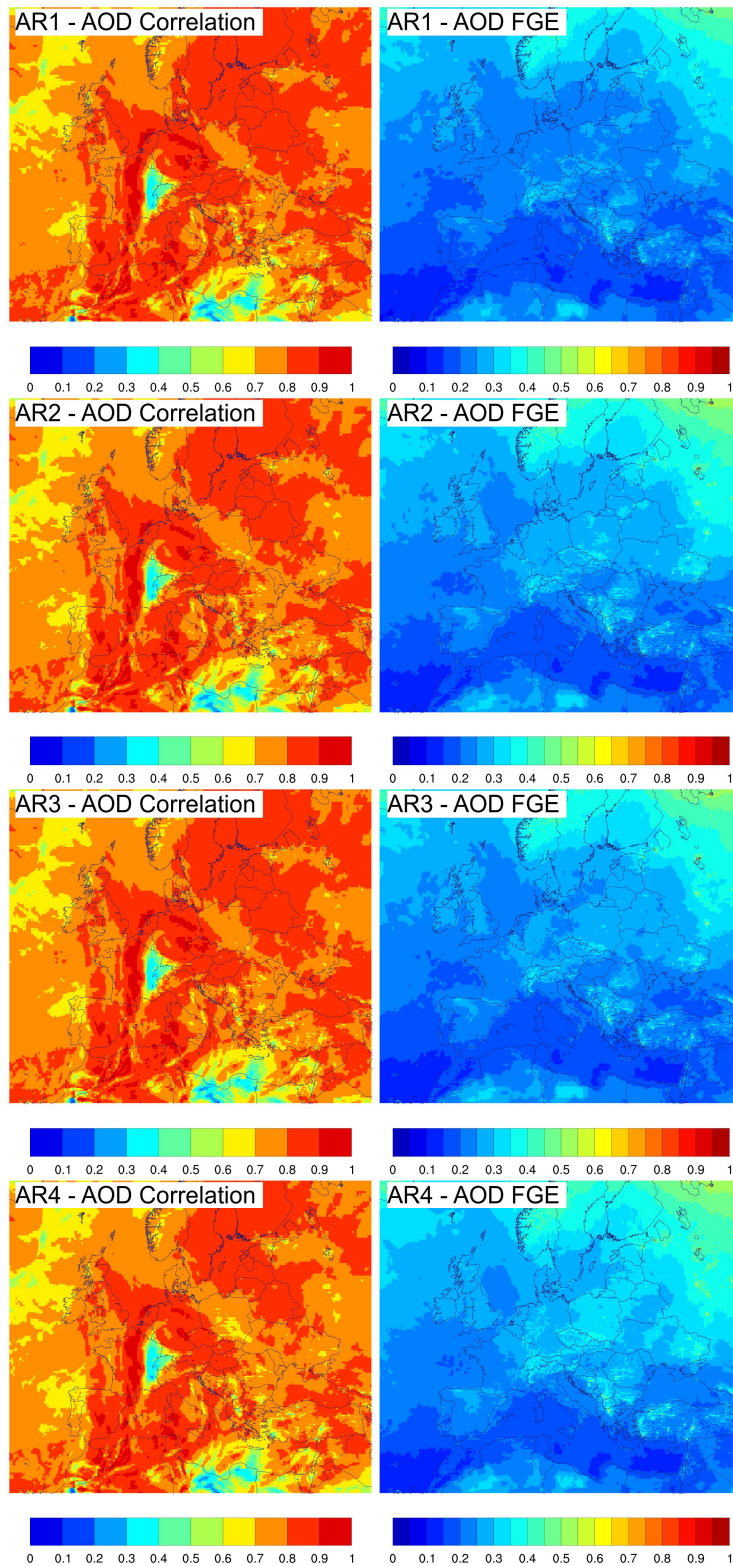

**Figure S8:** For each AR, the figures represent the Pearson correlation and the fractional gross error of AOD between the NR and the AR for the period from January to April 2014.
